# Supplementary material for: New insights into self-modification of mesoporous titania nanoparticles for enhanced photoactivity: effect of microwave power density on formation of oxygen vacancies and Ti3+ defects
Source: Royal Society of Chemistry journal article supplement (doi:10.1039/c5ra15120a), 2015-01-01
Supplement: c5ra15120a1.pdf [file c5ra15120a1.pdf]

**New insights into self-modification of mesoporous titania nanoparticles for enhanced photoactivity: Effect of microwave power density on formation of oxygen vacancies and Ti<sup>3+</sup> defects**

N.F. Jaafar<sup>1</sup>, A.A. Jalil<sup>2,3\*</sup>, S. Triwahyono<sup>1</sup>, and N. Shamsuddin<sup>3</sup>

*<sup>1</sup>Department of Chemistry, Faculty of Science, Universiti Teknologi Malaysia, 81310 UTM*

*Johor Bahru, Johor, Malaysia*

*<sup>2</sup>Center for Hydrogen Energy, Institute of Future Energy, Universiti Teknologi Malaysia, 81310*

*UTM Johor Bahru, Johor, Malaysia*

*<sup>3</sup>Department of Chemical Engineering, Faculty of Chemical Engineering, Universiti Teknologi*

*Malaysia, 81310 UTM Johor Bahru, Johor, Malaysia*

*\*To whom correspondence should be addressed,*

Aishah Abdul Jalil (Ph.D.)

Tel: 60-7-5535581 Fax: 60-7-5588166

Email: [aishah@cheme.utm.my](mailto:aishah@cheme.utm.my)

## Supplementary Data

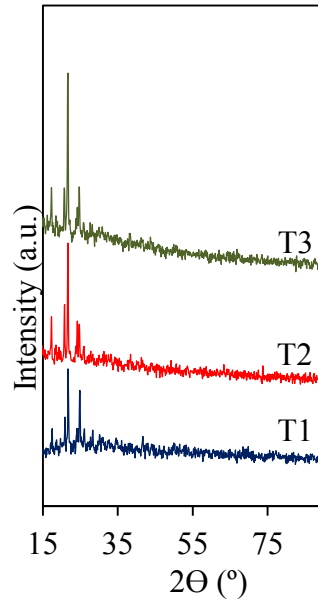

**Fig. S1.** XRD diffractograms of TiO<sub>2</sub> prepared under various microwave power densities before calcination.

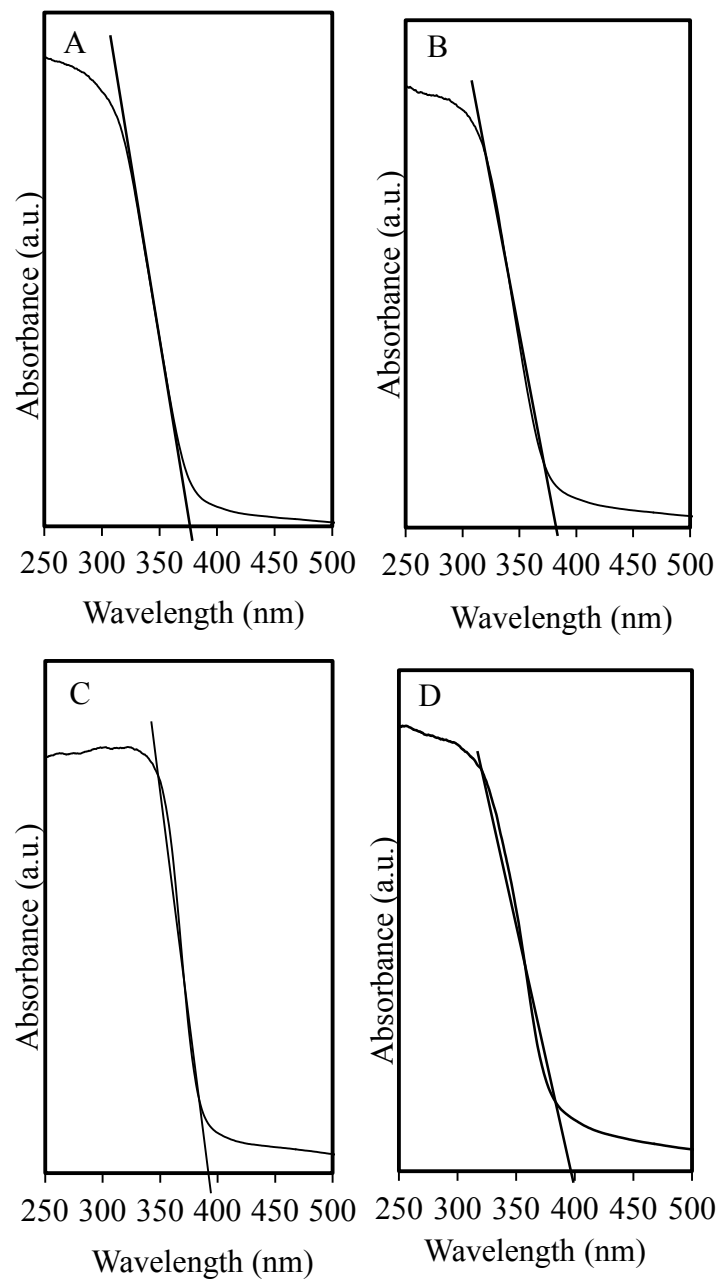

**Fig. S2.** UV-vis spectra of (A) TC, (B) T1, (C) T3 and (D) T3.

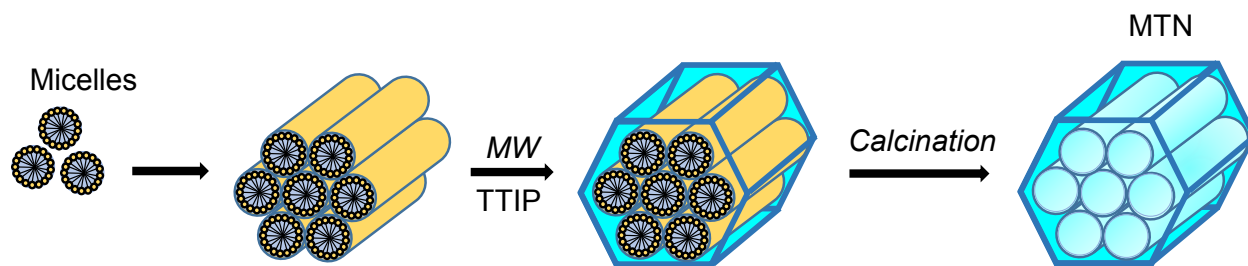

**Fig. S3.** Synthesis of Mesoporous Titanium Nanoparticles (MTN).

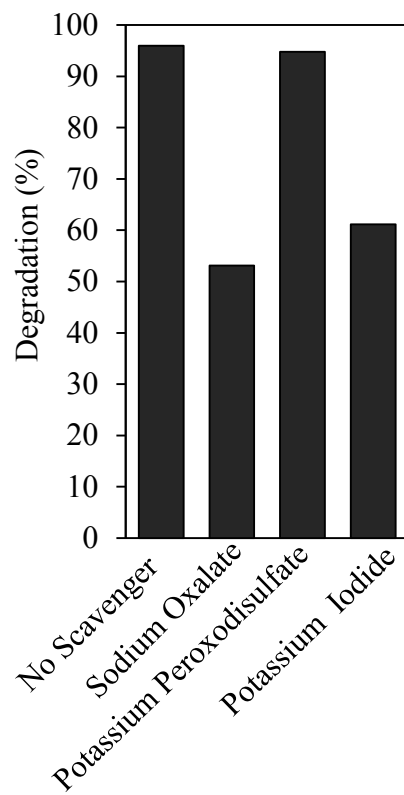

**Fig. S4.** Photodegradation efficiencies of 2-CP in the presence of hole scavenger, electron scavenger and  $\bullet\text{OH}$  scavenger using T3.

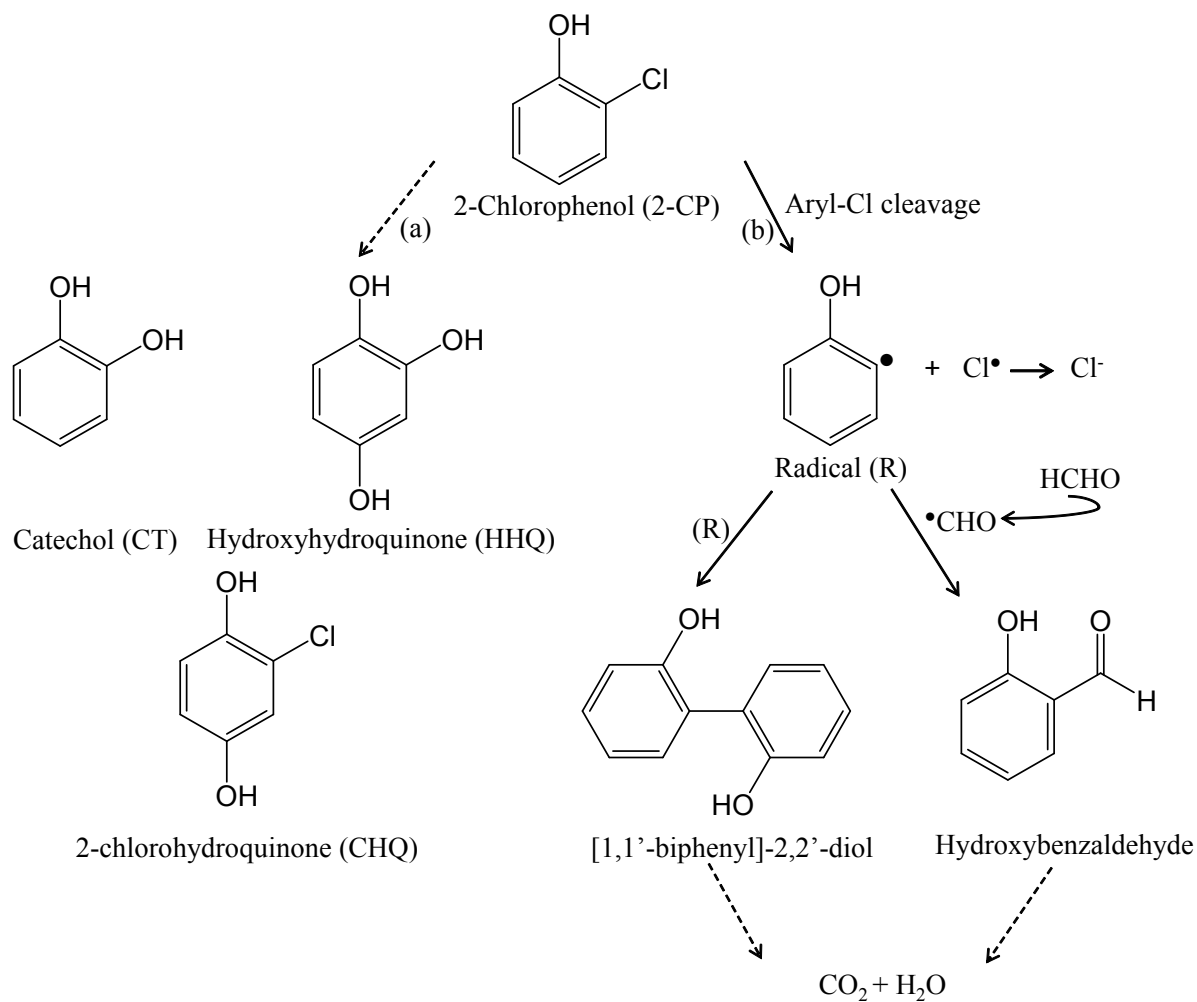

**Fig. S5.** Proposed mechanism of total mineralization of 2-CP using MTN.
